# Supplementary material for: The influence of crustal strength on rift geometry and development – insights from 3D numerical modelling
Source: Copernicus journal article supplement (doi:10.5194/se-14-369-2023), 2023-04-05
Supplement: Supplementary file 1 [file se-14-369-2023-supplement.zip]

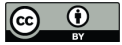

## *Supplement of*

# **The influence of crustal strength on rift geometry and development – insights from 3D numerical modelling**

**Thomas B. Phillips et al.**

*Correspondence to:* Thomas B. Phillips (tbphil13@gmail.com)

- se-14-369-2023-supplement-title-page.pdf
- B1\_surface.gif
- B2-CS\_Y375\_NIPS.gif
- B3-CS\_Y375\_SR.gif
- B4-CS\_Y300\_NIPS.gif
- B5-CS\_Y300\_SR.gif
- B6-CS\_Y240\_NIPS.gif
- B7-CS\_Y240\_SR.gif
- B8-CS\_X250\_NIPS.gif
- B9-CS\_X250\_SR.gif

The copyright of individual parts of the supplement might differ from the article licence.
